# Supplementary material for: miR-21 silencing ameliorates experimental autoimmune encephalomyelitis by promoting the differentiation of IL-10-producing B cells
Source: PubMed Central journal article supplement (PMC5706856; doi:10.18632/oncotarget.21578), 2017-10-06
Supplement: oncotarget-08-94069-s001.pdf [file oncotarget-08-94069-s001.pdf]

# miR-21 silencing ameliorates experimental autoimmune encephalomyelitis by promoting the differentiation of IL-10-producing B cells

## SUPPLEMENTARY MATERIALS

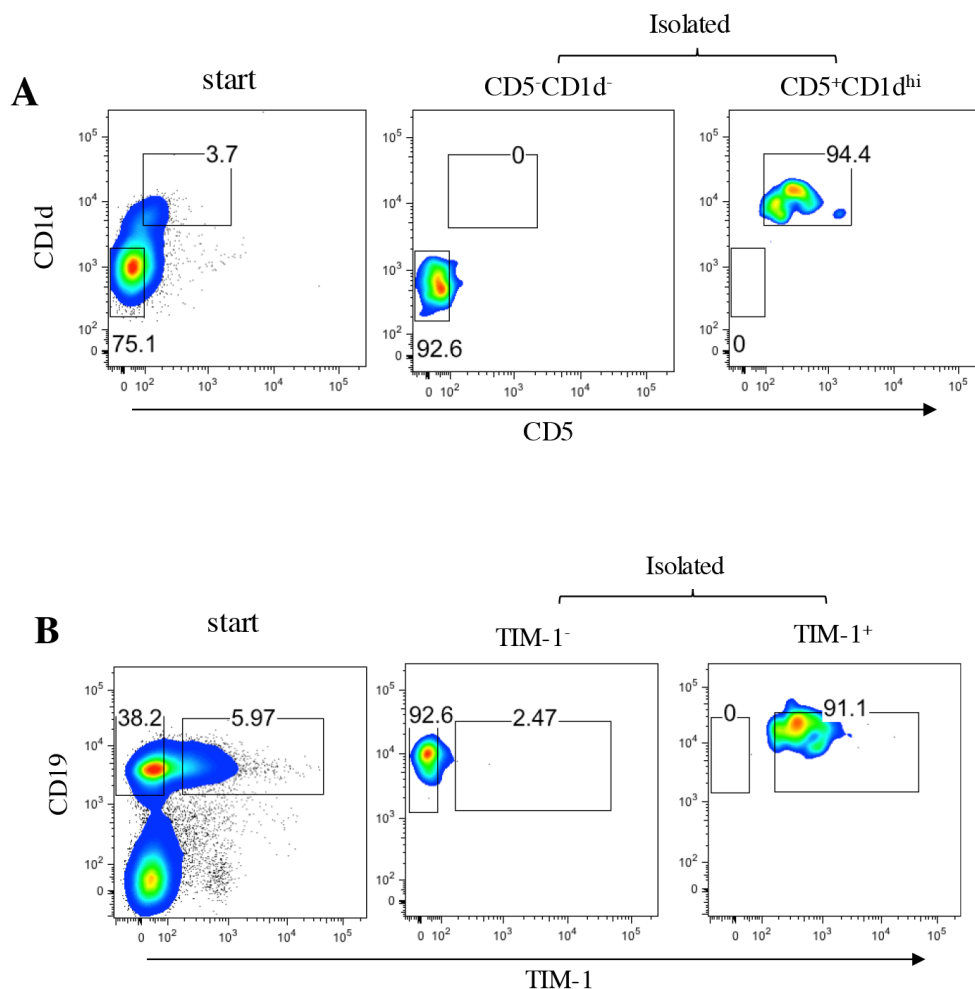

**Supplementary Figure 1:** (A) Purification of CD5<sup>+</sup>CD1d<sup>hi</sup> and CD5<sup>-</sup>CD1d<sup>-</sup> CD19<sup>+</sup> B cells. Spleen cells, harvested from B6 mice at the onset stage of EAE (day 14 after immunization), were stained with anti-CD19/anti-CD5/anti-CD1d, and sort-purified into CD5<sup>+</sup>CD1d<sup>hi</sup>, CD5<sup>-</sup>CD1d<sup>-</sup> B cells. The purity of isolated cell subsets was checked by flow cytometry. (B) Sort-Purification of TIM-1<sup>+</sup> and TIM-1<sup>-</sup> B cells. Splens cells, harvested from B6 mice at the onset stage of EAE (day 14 after immunization), were stained with anti-CD19/anti-TIM-1, and sort-purified into TIM-1<sup>+</sup> and TIM-1<sup>-</sup> B cells. The purity of cell subsets was checked by flow cytometry.
